# Supplementary material
Source: MDPI journal article supplement (https://www.mdpi.com/2304-6740/11/12/485)
Supplement: s1 [file s1]

## Supplementary Materials

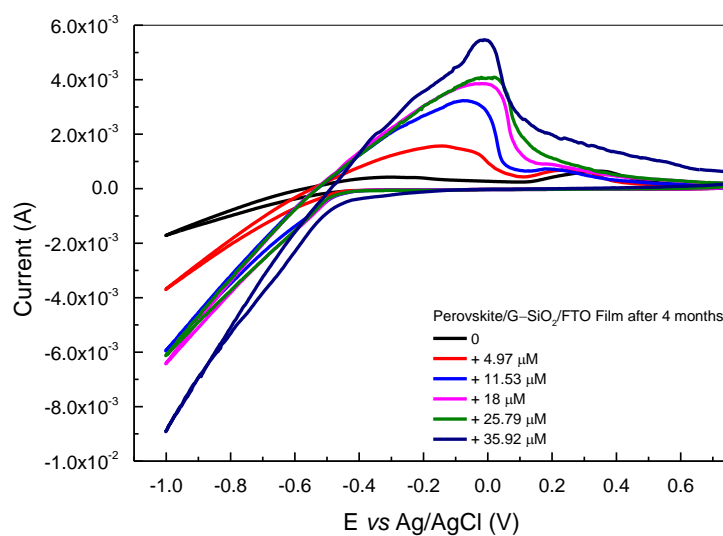

**Figure S1.** CV scans at 0.1 V/s of a four-month-old perovskite modified G-SiO<sub>2</sub>/FTO hybrid film electrode in the absence and presence of increasing concentrations of BV6 in DCM and 0.1 M TBAH electrolyte.
